# Supplementary material
Source: publisher figshare collection journal article supplement (https://frontiersin.figshare.com/ndownloader/files/10621699)
Supplement: Supplementary file [file 10621699]

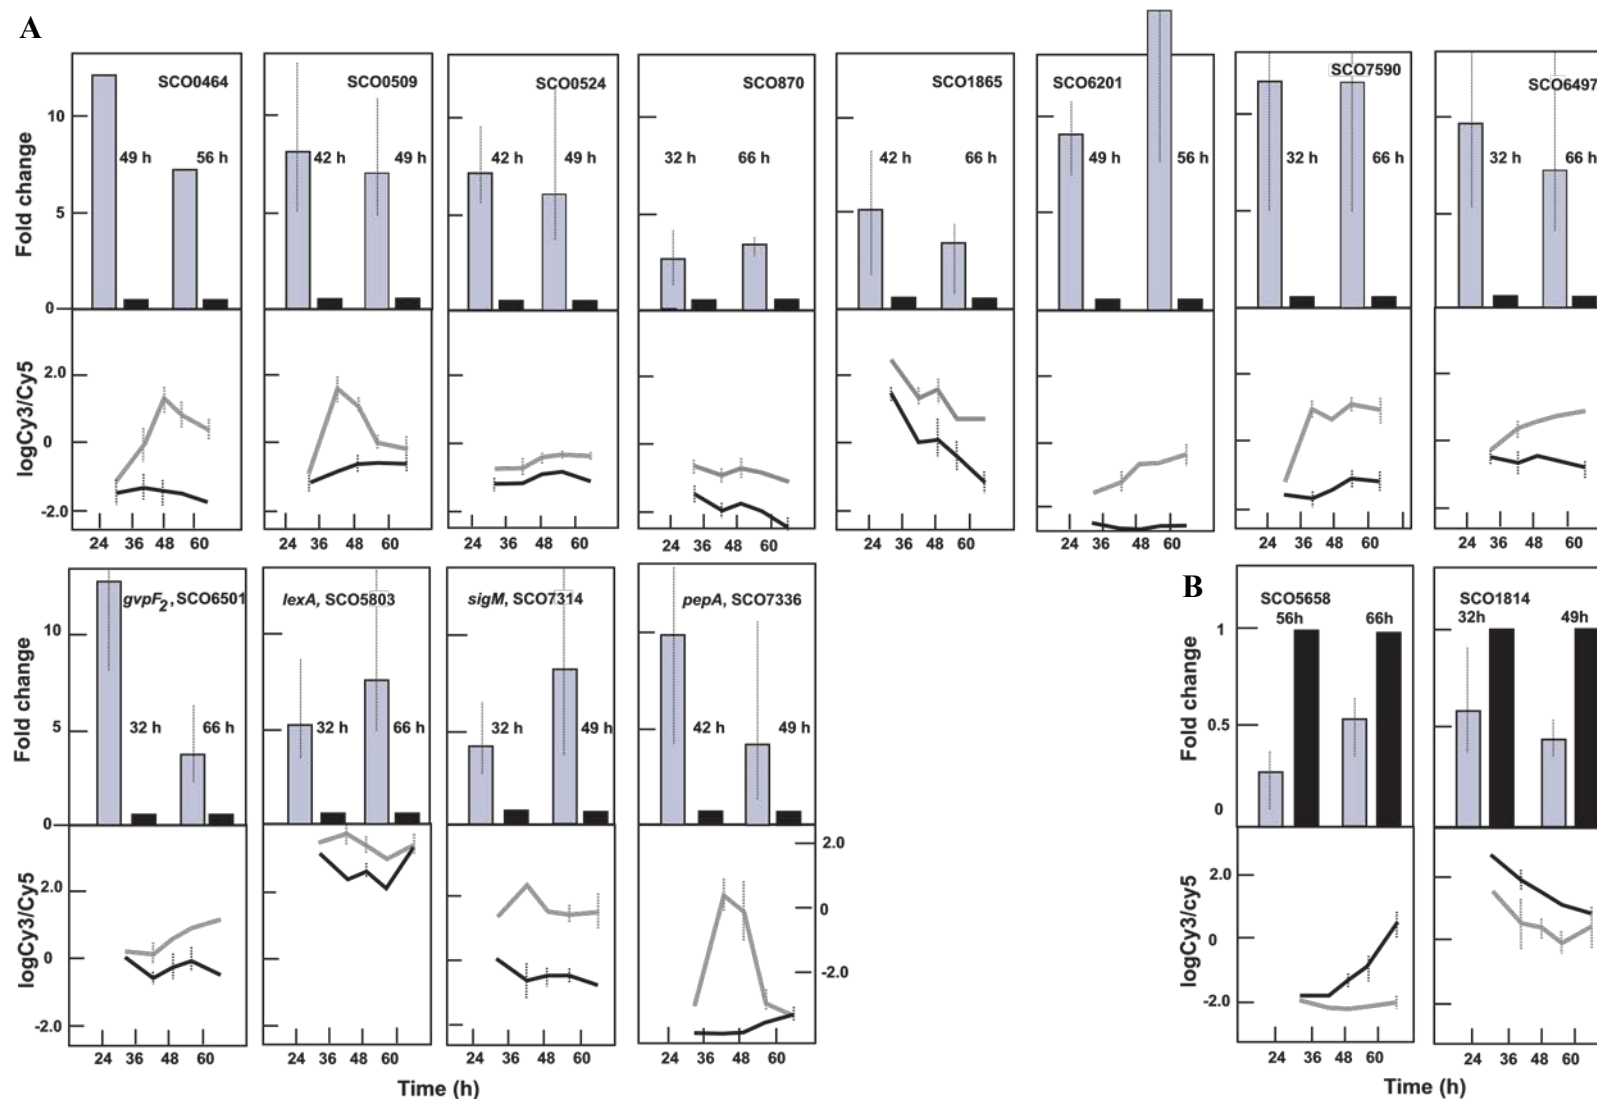

**Figure S2. Validation by qRT-PCR of the microarray data corresponding to genes showing different expression profile.** A) Validation of genes overexpressed in the *argR* mutant. B) Validation of genes underexpressed in the *argR* mutant. The expression is presented in relation to the control strain taken as 1. In the upper panels is indicated the name of the gene and the time of culture at which the qRT-PCR was performed. In the corresponding lower panel is shown the profile of the gene in the microarray study. Black bars and black lines correspond to the control strain *S. coelicolor* M145. Gray bars and gray lanes correspond to *S. coelicolor argR*.
